# Supplementary material for: Synergetic effect of Fe decorated Mn2O3 support in application of aerobic benzyl alcohol oxidation reaction
Source: Research Square preprint supplement (doi:10.21203/rs.3.rs-6281795/v1), 2025-03-26
Supplement: Supplementary file 1 [file b3311b787c91cc1793aec8d8.docx]

**Synergetic effect of Fe decorated Mn2O3 support in application of aerobic benzyl alcohol oxidation reaction**

*aDepartment of Chemistry ,Geethanjali college of engineering and technology(Autonomous) Hyderabad, 501301, India*

*bDepartment of Chemistry B V Raju Institute of Technology, Narsapur, Medak District, Telangana State, India.*

*c Department of chemistry, Nalla Narasimha Reddy Education Society's group of Institutions Hyderabad,500088, India*

*d Department of Chemistry, Vardhaman College of Engineering, Hyderabad, 501218, India*

*e Department of H&S (Chemistry), CVR College of Engineering, Hyderabad, 501510, India*

*f Department of Science & Humanities, MLR Institute of Technology, Hyderabad*

E-mail: vishnuiict@gmail.com;

**Chemical list**

Propane 8000 ppm remaining filled with N2, Oxygen 80000 ppm remaining filled with nitrogen, benzaldehyde, Palladium nitrate, octylamine, formaldehyde, ethanol, NaBH4, hexane, cerium nitrate hexahydrate and ammonium hydroxide and double distilled water were purchased from Sigma–Aldrich India.

**Materials characterization**

To determine the crystalline nature of the catalysts, an X-ray diffractometer (Rigaku miniflex) was used for the powder X-ray diffraction (XRD) examination. Utilizing Ni-filtered Cu Kα radiation (λ = 0.15406 nm) from 2θ = 2o to 80o, the analysis was carried out at a scan rate of 2o min–1 with a current beam of 15 mA and a beam voltage of 30 kV. A JEOL 2010 electron microscope device running at 200 kV was used for TEM experiments. The catalyst was put onto a copper grid covered with carbon after being dissolved in ethanol. The microscope column was filled with the sample-containing specimen and then evacuated at a pressure of 10-6 Torr. X-ray photoelectron spectra (XPS) catalysts were recorded using a Thermo Scientific Multilab 2000 with Al K radiation (1486.6 eV) running at 15 kV and 10 mA (150 W). The binding energies mentioned here are for C 1s at 284.5 eV. To desorbs any adsorbed species that might have been on the sample surface, the samples were spread out on conductive carbon tape and placed in an ultrahigh vacuum (UHV) preparation chamber for XPS analyses. After five hours, the samples were progressively transferred to the analyzer chamber using UHV. Pass energy of 30 eV and a stepwise increase of 0.05 eV were used to record all spectra.
